# Supplementary material for: A pathway independent multi-modular ordered control system based on thermosensors and CRISPRi improves bioproduction in Bacillus subtilis
Source: PubMed Central journal article supplement — Nucleic Acids Res. 2022 Jun 7;50(11):6587–600. doi: 10.1093/nar/gkac476 (PMC9226513; doi:10.1093/nar/gkac476), 2022-06-07
Supplement: gkac476_supplemental_file.pdf [file gkac476_supplemental_file.pdf]

## Supplementary materials for

### **A pathway independent multi-modular ordered control system based on thermosensors and CRISPRi improves bioproduction in *Bacillus subtilis***

Wenwen Yu<sup>1,2</sup>, Ke Jin<sup>1,2</sup>, Yaokang Wu<sup>1,2</sup>, Quanwei Zhang<sup>1,2</sup>, Yanfeng Liu<sup>1,2</sup>, Jianghua Li<sup>1,2</sup>, Guocheng Du<sup>2</sup>, Jian Chen<sup>2</sup>, Xueqin Lv<sup>1,2</sup>, Rodrigo Ledesma-Amaro<sup>3</sup>, Long Liu<sup>1,2†</sup>

<sup>1</sup> Key Laboratory of Carbohydrate Chemistry and Biotechnology, Ministry of Education, Jiangnan University, Wuxi 214122, China.

<sup>2</sup> Science Center for Future Foods, Jiangnan University, Wuxi 214122, China.

<sup>3</sup> Department of Bioengineering and Centre for Synthetic Biology, Imperial College London, London SW7 2AZ, UK.

†Corresponding author: Long Liu, Tel.: +86-510-85918312, Fax: +86-510-85918309, E-mail: [longliu@jiangnan.edu.cn](mailto:longliu@jiangnan.edu.cn)

**Table. S1 Primers used in this study**

| Primer    | Sequence                                                          |
|-----------|-------------------------------------------------------------------|
| futc-F1   | AGAGGCGATTATGTTGGCATTG                                            |
| futc-R1   | CGGATAGCCCAGATCCAGATT                                             |
| manB-F1   | TGGCGGCATTGAAGTTACC                                               |
| manB-R1   | TCATCAACGGGAGGGAAGTC                                              |
| ndk-F1    | TCAGAGCCGTGGATGATGTT                                              |
| ndk-R1    | ACCTGTATTCGCAATGGTGTG                                             |
| gmk-F1    | CCAAGAGAGGGCGAAGTGA                                               |
| gmk-R1    | AAGCGTCTGTTCAACATAATCG                                            |
| zwf-F1    | AGCACACGCACAGCCAAT                                                |
| zwf-R1    | CTCCAAGAAAGGGCAACTTCAT                                            |
| pfkA-F1   | GGTCAGCAGCACTCGGAGAA                                              |
| pfkA-R1   | GCGGCAAGAAGCACAGTATT                                              |
| lytC-F1   | GACTTCTTTCTCAAGGAGTCC                                             |
| lytC-R1   | GAAACACTCCTGCCGTAAG                                               |
| FL-hbs-F  | CGTTCACGCACCTCGAAGTTACC                                           |
| FL-hbs-R  | CGGTTGCAGAAGCAAGCGAATTG                                           |
| ameye-D-F | CGGAAGAAACATTTGGCTAATTCCCCATTGAGGGCAAG                            |
| ameye-D-R | TGTGAAGGAACTGTTCTTTTTCTTT                                         |
| ameye-F   | CTGGATTTTTATTGCTGTTTCATT                                          |
| ameye-R   | AGTTCAGCTCAGTGATACCTG                                             |
| ameye-S-F | GATAGCTTCTCGTTCAGGCGAGCGGATAACAATTTACACAG                         |
| ameye-S-R | TCTTTTTTGTTGACATGTGTACATTTACCTCCTTTG                              |
| ameye-U-F | GCAAAACGATTCAAAACCTCT                                             |
| ameye-U-R | GTGAAATTGTTATCCGCTCGCCTGAACGAGAAGCTATC                            |
| CI857-F   | CAAAGGAGGTGAAATGTACACATGTCAACAAAAAAGAAACCGC                       |
| CI857-R   | CCCTCAATGGGGAATTAGCCAAATGTTTCTTCCGG                               |
| Pveg-NF1  | AACACCTTATTAACGTTGATATNAACACCGTGCGTGTTNACATACCTCT<br>GGCGGTGATAA  |
| Pveg-NF2  | AACACCTTATTAACGTTGATATTNNNNNCGTGCCNNNNNGACATACCTCT<br>GGCGGTGATAA |
| Pveg-NF3  | AACACCTTATTAACGTTGATATTAACACNNNNNGTGTTGACATACCTCT<br>GGCGGTGATAA  |
| Pveg-NR   | AATATCAACGTTAATAAGGTGTTAGATATTTAT                                 |

|           |                                                   |
|-----------|---------------------------------------------------|
| H-Pveg5-F | CATGGATGAACTGTACAAATAACTGCAGGTCGACGTCC            |
| H-Pveg5-R | CGCACGGTGTTAATATCAACGTTAATAATAGAGCGCAACGCAATTAATG |
| Pveg5-F   | CATTAATTGCGTTGCGCTCTATTATTAACGTTGATATTAACACCGTGCG |
| Pveg5-R   | GTCGACCTGCAGTTATTTGTACAGTTCATCCATGCCA             |
| npre-F    | CTTGCGGCAGCCATCTTCAC                              |
| npre-R    | GCCATCGTCACCCACTTA                                |
| ganA-F    | GTGATGTCAAAGCTTGAAAAACG                           |
| ganA-R    | TTTTCCAAAGCAATAACGCTGGA                           |
| bpr-F     | TTAGGCGCATTAAACAGTCGGC                            |
| bpr-R     | GGATGAATAATCGCGTCAAAC                             |
| epr-F     | TTGTGCAGACTCTGAAAAGGT                             |
| epr-R     | ACTGAAGCCGACTAAAATCGGC                            |
| apre-F    | AACATCAGGATGCTGACAAATAAAA                         |
| apre-R    | AGAGGGTAAAGAGTGAGAAGC                             |
| ldh-R     | TTGAAGGCAGGAAGGCT                                 |
| ldh-F     | GCAACAAAATTGCCTGATGG                              |

**Table. S2 Plasmids used in this study**

| Plasmid      | Characteristics                                                                                                                               | Ref.      |
|--------------|-----------------------------------------------------------------------------------------------------------------------------------------------|-----------|
| pHTa0        | ColE1 Amp <sup>r</sup> , Cm <sup>r</sup> , <i>E. coli</i> - <i>B. subtilis</i> shuttle vector, $\Delta P_{grac}::$<br><i>egfp</i>             | Lab stock |
| pHTa1        | pHTa0 derivate, P <sub>R</sub> - <i>egfp</i>                                                                                                  | This work |
| pHTa1-2      | pHTa0 derivate, P <sub>veg</sub> - <i>egfp</i>                                                                                                | This work |
| pHTa2        | pHTa0 derivate, P <sub>veg1</sub> - <i>egfp</i>                                                                                               | This work |
| pHTa3        | pHTa0 derivate, P <sub>veg2</sub> - <i>egfp</i>                                                                                               | This work |
| pHTa4        | pHTa0 derivate, P <sub>veg3</sub> - <i>egfp</i>                                                                                               | This work |
| pHTa5        | pHTa0 derivate, P <sub>veg4</sub> - <i>egfp</i>                                                                                               | This work |
| pHTa6        | pHTa0 derivate, P <sub>veg5</sub> - <i>egfp</i>                                                                                               | This work |
| pP43-mCherry | ColE1 Amp <sup>r</sup> , RepB Km <sup>r</sup> , <i>E. coli</i> - <i>B. subtilis</i> shuttle vector,<br>mCherry expressed from P <sub>43</sub> | This work |
| pLCT-dCpf1   | pMB1 Spec <sup>r</sup> , Cm <sup>r</sup> P <sub>veg5</sub> -dCpf1 integrant expression at <i>nprE</i><br>locus of <i>B. subtilis</i>          | This work |
| pLCT2-dCpf1  | pMB1 Spec <sup>r</sup> , Cm <sup>r</sup> P <sub>veg</sub> -dCpf1 integrant expression at <i>ganA</i><br>locus of <i>B. subtilis</i>           | This work |

**Table S3. Sequences of genetic parts used in this study**

| Name                     | Sequence                                                                                  |
|--------------------------|-------------------------------------------------------------------------------------------|
| <i>P<sub>veg</sub></i>   | TTATTAACGTTGATATAATTTAAATTTTATTTGACAAAAATGGGCTCGTGTT<br>GTACAATAAATGT                     |
| <i>P<sub>veg1</sub></i>  | TTATTAACGTTGATATAATTTAAATTTTATTTGACATAACACCGTGCGTGTT<br>GTACAATAAATGT                     |
| <i>P<sub>veg2</sub></i>  | TTATTAACGTTGATATTAACACCGTGCGTGTTGACAAAAATGGGCTCGTGT<br>TGTACAATAAATGT                     |
| <i>P<sub>veg3</sub></i>  | TTATTAACGTTGATATAATTTAAATTTTATTTGACAAAAATGGGCTCGTGTT<br>GTACAATAAATGTAGTAACACCGTGCGTGTTG  |
| <i>P<sub>veg4</sub></i>  | TTATTAACGTTGATATTAACACCGTGCGTGTTGACAAAAATGGGCTCGTGT<br>TGTACAATAAATGTAGTACCTCTGGCGGTGATAA |
| <i>P<sub>veg5</sub></i>  | TTATTAACGTTGATATTAACACCGTGCGTGTTGACATACCTCTGGCGGTGA<br>TAATACAATAAATGT                    |
| <i>P<sub>veg32</sub></i> | TTATTAACGTTGATATTTATTGCGTGCATGTTGACATACCTCTGGCGGTGA<br>TAATACAATAAATGT                    |
| <i>P<sub>veg34</sub></i> | TTATTAACGTTGATATTAACACGGGTAGTGTTGACATACCTCTGGCGGTGA<br>TAATACAATAAATGT                    |
| <i>P<sub>veg37</sub></i> | TTATTAACGTTGATATTGGCGGCGTGCTCGTTGACATACCTCTGGCGGTG<br>ATAATACAATAAATGT                    |
| <i>zwf</i> -<br>crRNA1   | GCAAAACGAAAATTGTATCCGTC                                                                   |
| <i>zwf</i> -<br>crRNA2   | TGCGCGGACAATATCATGCTGGT                                                                   |
| <i>zwf</i> -<br>crRNA3   | GTGAAAGACGGCTTACACTGGTG                                                                   |
| <i>pfkA</i> -<br>crRNA1  | CAACGGATACGCGGGATTGATCA                                                                   |
| <i>pfkA</i> -<br>crRNA2  | CATGTGTAGGTGTACCGGTACA                                                                    |
| <i>pfkA</i> -<br>crRNA3  | AAGAAGAAACAAATCTTGAAACT                                                                   |
| <i>lytC</i> -<br>crRNA1  | GCCGATAACTCAGTGAAAAGAGT                                                                   |
| <i>lytC</i> -            | AACGGCTTCTTATATGCAGACGC                                                                   |

crRNA2

*lytC*-

TCAGTATACATGCAAATGCTAAT

crRNA3

ATGTCAACAAAAAAGAAACCGCTGACACAAGAACAACCTGGAAGATGCAAG  
AAGACTGAAAGCAATTTATGAAAAAAGAAAAATGAACTGGGCCTGTCACA  
AGAATCAGTTGCAGATAAAATGGGCATGGGCCAAAGCGGCGTTGGCGCA  
CTGTTTAATGGCATTAAATGCACTGAATGCATATAATGCAGCACTGCTGACA  
AAAATTCTGAAAGTTTCAGTTGAAGAATTTTCACCGTCAATTGCAAGAGAA  
ATTTATGAAATGTATGAAGCAGTTTCAATGCAACCGTCACTGAGATCAGAA  
TATGAATATCCGGTTTTTTTTCACATGTTCAAGCGGGCATGTTTTTCACCGAAA  
CTGAGAACATTTACAAAAGGCGATGCAGAAAGATGGGTTTCAACAACAAA  
AAAAGCATCAGATTCAGCATTTTGGCTGGAAGTTGAAGGCAATTCAATGA  
CAGCACCGACGGGCTCAAACCGTCATTTCCGGATGGCATGCTGATTCTG  
GTTGATCCGGAACAAGCAGTTGAACCGGGCGATTTTTGCATTGCAAGACT  
GGGCGGCGATGAATTTACATTTAAAAAACTGATTAGAGATAGCGGCCAAG  
TTTTCTGCAACCGCTGAATCCGCAATATCCGATGATTCCGTGCAATGAAT  
CATGCTCAGTTGTTGGCAAAGTTATTGCATCACAATGGCCGGAAGAAACA  
TTTGGCTAA

CJ<sup>857</sup>

ATGCTAACTTGCTTTAAAGCTTATGATATTCGCGGGAACTAGGCGAAGAA  
CTGAATGAAGATATCGCCTGGCGCATTGGGCGTGCCTATGGCGAATTTCT  
CAAACCGAAAACCATTTGTGTTAGGCGGTGATGTCCGCCTCACCAGCGAAA  
CCTTAAACTGGCGCTGGCGAAAGTTTACAGGATGCGGGCGTCGATGT  
GCTGGATATCGGTATGTCCGGCACCGAAGAGATCTATTTGCCACGTTCC  
ATCTCGGCGTGGATGGCGGCATTGAAGTTACCGCCAGCCATAATCCGAT  
GGATTATAACGGCATGAACTCGTGC GCGAGGGGGCTCGCCCGATCAGC  
GGGATAACCGGACTGCGCGATGTCCAGCGTCTGGCAGAAGCCAACGACT  
TCCCTCCCGTTGATGAAACCAAACGCGGTCGTTATCAGCAAATCAATCTG  
CGTGACGCTTACGTTGATCACCTGTTCCGGTTATATCAACGTCAAAAACCTC  
ACGCCGCTCAAGCTGGTGATTA ACTCCGGGAATGGCGCGGCGGGGCCG  
GTGGTGGACGCCATTGAAGCCCGCTTTAAAGCCCTCGGCGCACCGGTGG  
AATTAATCAAAGTACACAACACGCCGGACGGCAATTTCCCAACGGTATT  
CCTAACCCGTTGCTGCCGGAATGCCGCGACGACACCCGTAATGCGGTCA  
TCAAACACGGCGCGGATATGGGCATTGCCTTTGATGGCGATTTTGACCGC  
TGTTTCCTGTTTGACGAAAAAGGGCAGTTTATCGAGGGCTACTACATTGTC  
GGCCTGCTGGCAGAAGCATTCTCGAAAAAATCCCGGCGCGAAGATCA

*manB*

TCCACGATCCGCGTCTCTCCTGGAACACCGTTGATGTGGTGACCGCCGC  
GGGCGGCACTCCGGTATGTGCGAAAACCGGACACGCCTTTATTAAGAA  
CGTATGCGCAAGGAAGACGCCATCTACGGTGGCGAAATGAGCGCCCACC  
ACTATTTCCGTGATTTTCGCTTACTGCGACAGCGGCATGATCCCCTGGCTG  
CTGGTCCGCGAACTGGTGTGTCTGAAAGGAAAAACGCTGGGCGAACTGG  
TGCGCGACCGGATGGCGGCGTTTCCGGCAAGCGGTGAGATCAACAGCAA  
ACTGGCGCACCCCGTTGAGGCGATTAATCGCGTCGAACAGCATTTTAGCC  
GCGAGGCGCTGGCGGTGGATCGCACCGATGGCATCAGCATGACCTTTGC  
CGACTGGCGCTTTAACCTGCGCTCCTCCAACACCGAACCGGTGGTGGG  
TTGAATGTGGAATCGCGCGGTGATGTACCGCTGATGGAAGAAAAGACAAA  
ACTTATCCTTGAGTTACTGAACAAGTAA

ATGGCATTTAAGGTTGTTTCAGATTTGCGGGGGGTTAGGGAATCAGATGTT  
TCAATATGCGTTTGCGAAAAGCCTGCAAAAACACTCAAATACGCCGGTTC  
TGCTGGATATTACGTGTTTTGATTGGTCAGATAGAAAATGCAACTGGAAC  
TGTTTCCGATCGATCTGCCATATGCAAGCGAAAAAGAAATTGCAATCGCA  
AAAATGCAACATCTGCCTAACTGGTGAGAGATGCGCTGAAATGCATGGG  
ATTCGACCGCGTTTCAAAGAAATTGTTTTTGAATACGAGCCGGAAGTCT  
GAAACCGTCAAGACTGACATACTTCTATGGTTACTTCCAAGATCCGAGATA  
TTTTGATGCGATCAGTCCTCTGATTAACAAACATTTACTGCGCCGCC  
GCCGCTGAAAATGGCAACAATAAAAAGAAAGAAGAGGAATATCACCGCA  
AATTAGCACTGATTCTGGCAGCAAAAATTCAGTTTTTGTTCATATTAGAA  
GAGGCGATTATGTTGGCATTGGCTGCCAACTGGGCATTGATTATCAAAAA  
AAAGCACTGGAATATATGGCAAAAAGAGTTCCGAATATGGAAGTGTGTT  
TTTTGCGAAGATCTGACATTTACACAAAATCTGGATCTGGGCTATCCGTTT  
ATGGATATGACAACAAGAGATAAAGAAGAAGAAGCATATTGGGATATGCT  
GCTGATGCAATCATGCCAACATGGCATTATTGCAAATTCACATATTCATG  
GTGGGCAGCATATCTGATTAATAATCCGGAAAAAATTATTATTGGCCCGAA  
ACATTGGCTGTTTGGCCATGAAAATATTCTGTGCAAAGAATGGGTAAAAT

*futC*

TGAATCACATTTTGAAGTTAAATCACAAAAATATAATGCATAA  
ATGAAAGAAAGAGGGTTATTAATCGTTCTCTCAGGTCCCTCAGGAGTTGG  
TAAAGGAACGGTTCGACAAGCGATCTTTTTCGAGGAAGACACAAAATTTG  
AATATTCGATTTTCAGTAACCACAAGAAGTCCAAGAGAGGGCGAAGTGAAC  
GGAGTCGATTATTTTTTCAAACAAGAGACGAATTCGAGCAAATGATTGCG  
GACAACAAGCTGCTTGAATGGGCGAGAGTATGTCGGCAATTATTACGGCAC  
GCCAGTCGATTATGTTGAACAGACGCTTCAAGATGGAAGAACGCTTTTTT

*gmk*

AGAAATTGAAGTTCAAGGGGCTCTTCAAGTGAGAAATGCTTTCCCGGAAG  
 GCCTGTTTTATTTTCTTGCGCCTCCAAGCCTTTCTGAACTGAAAAACAGAA  
 TCGTGACACGAGGAACAGAAACAGACGCTCTGATTGAAAATCGAATGAAA  
 GCCGCAAAGCTGAGATCGAAATGATGGATGCTTATGACTATGTCGTTGA  
 AAACGATAATGTCGAAACGGCTTGCGATAAAATCAAAGCAATCGTTCTTGC  
 TGAACATTTGAAGCGTGAACGCGTTGCACCAAGATATAAGAAAATGCTGG  
 AGGTTGAATAA

ATGATGGAAAAGACTTTTTATCATGGTGAACCAGACGGTGTCCAACGTCA  
 GCTCATTGGGGACATTTTATCTAGATTGGAACGTAAGGGCTTACAATTAGC  
 TGCGGCCAAGTTAATGAGAGTGACTGAACAAATGGCTGAGAAACACTACG  
 CCGAACATCAAGGTAAGCCTTTCTTCGGAGAGCTCGTTGAGTTTATTACTT  
 CAGGACCTGTATTCGCAATGGTGTGGGAAGGCGAAAATGTCATTGAAGTG  
 ACGAGACAGCTGATCGGGAAAACAAACCCTAAAGAAGCTTTACCTGGTAC  
 GATTCGTGGGGATTATGGCATGTTTGTGCGAAAAACATCATCCACGGCT  
 CTGATTCTCTCGAAAGTGCAGAACGCGAGATTAACATTTTCTTTAAGAATG  
 AAGAATTAGTATCATATCAGCAGCTTATGGCAGGCTGGATCTATTAATCAT  
 TGTGAAAATAAGCAACAGAGCCGGCAACATATAACGCCGCCGGTTTTTGT  
 TCTGTTTTGTAAAGGTTTACATTAAGTGAATAAAGGGTTGAATGGCAGTG  
 ndk TGCATCAGACCTCTGCCTTTCCCAACGATCTAAAATCAGCTGAAAAGCTG  
 ATTTTTTTATTGAAACAATAAATTTCTGATAAAAACAAGCTATACTAGGAC  
 AAAAAGACAGCGAGACTGGGAGAGTAGAGATGGATACATACAGCGTATTT  
 ACAACGAAATGGAACAATTAACCGGAGTCGATTTAACACTATATAAAGAA  
 GCACAAATGAAGAGAAGGCTAACGTCACCTTTATGAGAAAAAGGGTTCCA  
 AAGCTTTAAGGACTTTGCTGCGGCATTGGAAAAGGATCAAGCTCTCTTAA  
 ATGAAACATTGGACAGAATGACGATCAATGTTTCAGAATTTTATCGTAATT  
 ATAAAAGATGGGAAGTTCTTGAGACTGCAATTCTGCCGTTAATCAAGACCT  
 CTAGGCCTTTAAAAATTTGGAGTGCCGCCTGCTCAACGGGGGAGGAGCC  
 ATACACGCTTGCCATGCTTTTGGACCAGCAAAAAGGTCTTCCGGGCTATC  
 AGATTTTAGCGACGGATATTGATGAAAAAGCATTGGAAAAAGCGAAAAAA  
 GGCGTTTATCAGGAGCGGTCTTTACA

**Table S4 Hill-equation fitting parameters of gene expression fine-tuning**

| Promoter   | $y_{min}$             | $y_{max}$                | $K$                   | $n$                   | $R^2$   |
|------------|-----------------------|--------------------------|-----------------------|-----------------------|---------|
| $P_{veg5}$ | 19.97805 ±<br>14.5704 | 2378.71118 ±<br>29.95501 | 38.21927 ±<br>0.04872 | 62.02255 ±<br>2.92182 | 0.99959 |

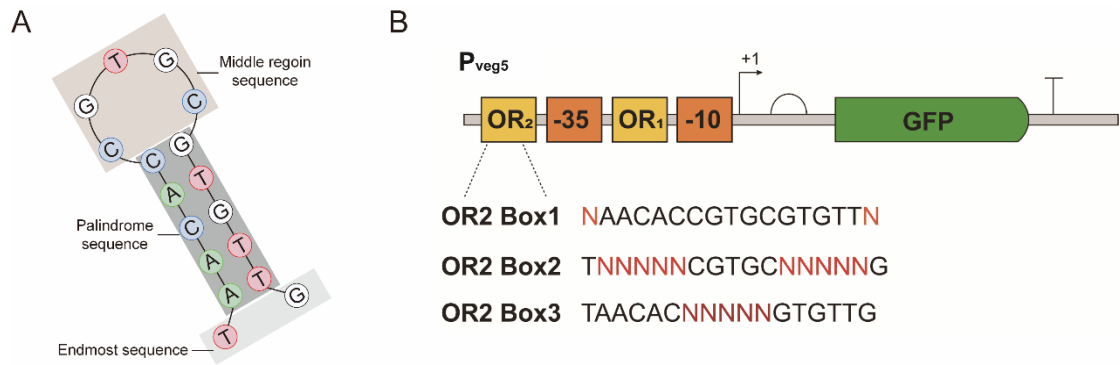

**Figure S1** (A) Modular OR<sub>2</sub> sequence, including endmost sequence module (T and G), palindrome sequence module (AACAC and GTGTT) and middle region sequence module (CGTGC). (B) Three type of promoter mutation libraries at the OR<sub>2</sub> region.

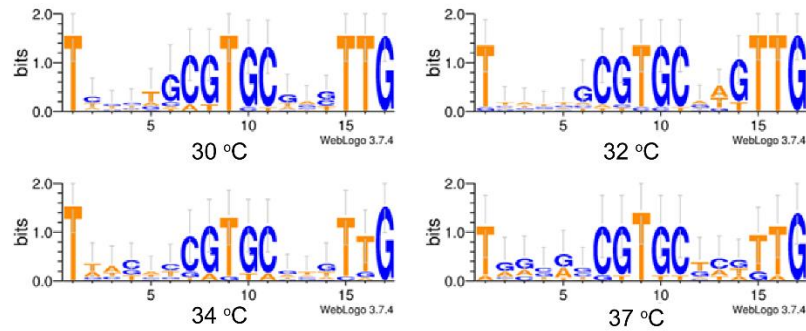

**Figure S2** Sequence features at OR<sub>2</sub> region of promoter variants with different transition points (30, 32, 34 and 37 °C).

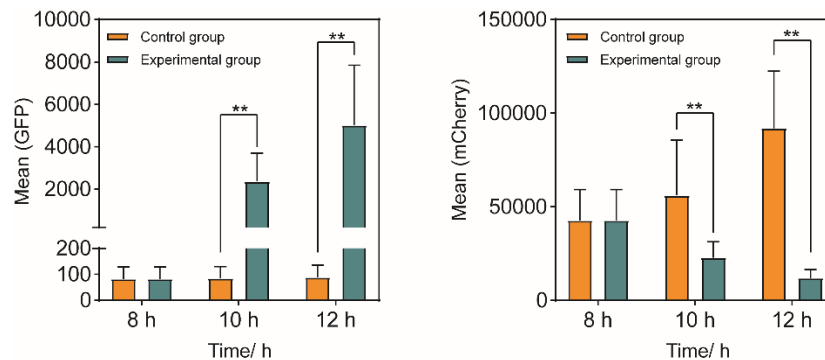

**Figure S3** The switching effects of bifunctional temperature-responsive genetic circuits. The control group was cultured under constant temperature fermentation at 32 °C for 12 h and the experimental group was cultured by using single-switch control (0-8 h at 32 °C and 8-12 h at 39 °C).



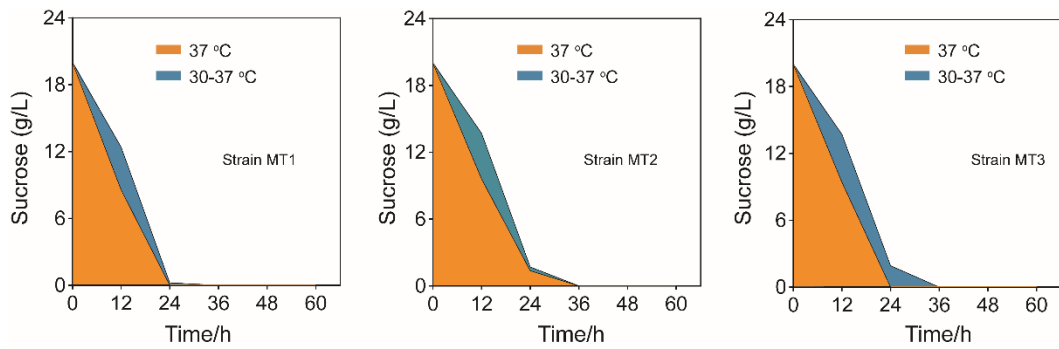

**Figure S4** The sucrose concentration of strain MT1, MT2 and MT3 under different bioprocesses, including constant temperature fermentation at 37 °C for 60 h and single-switch control (0-12 h at 30 °C and 12-60 h at 37 °C).

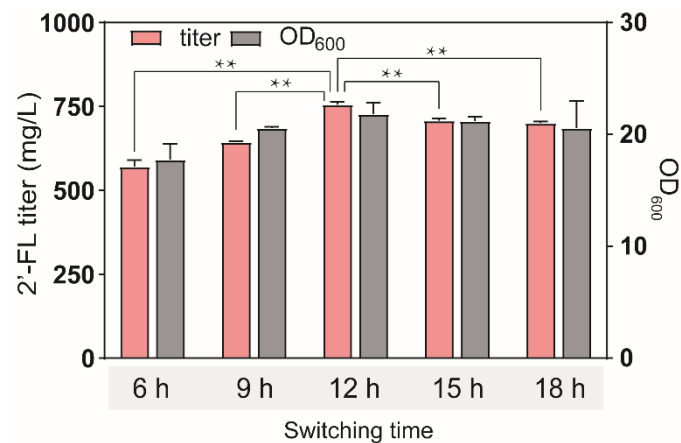

**Figure S5** The cell growth and 2'-FL titer of strain MT3 (*manB* and *futC* were driven by  $P_{veg34}$ ) under single-switch control from 30 to 37 °C with different switching times (6, 9, 12, 15 and 18 h). The statistical analysis is based on Student's *t*-test. All data were the average of three independent studies with standard deviations. \*\* $P < 0.01$ .

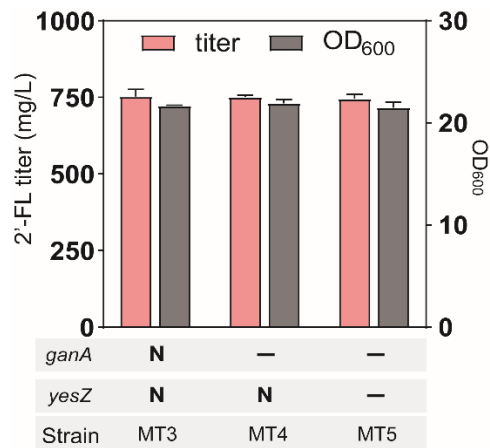

**Figure S6** OD<sub>600</sub> and 2'-FL titer of strain MT3, MT4 and MT5 with single-switch control (0-12 h at 30 °C and 12-60 h at 37 °C). The strain MT4 was obtained by knocking out gene *ganA* of strain MT3, and MT5 was obtained by knocking out *yesZ* of strain MT4. 'N' means no knockout and '-' means knockout. All data were the average of three independent studies with standard deviations.

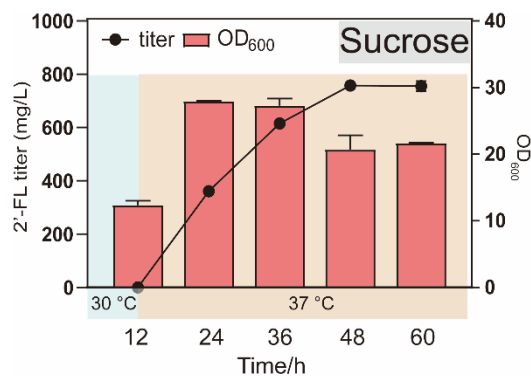

**Figure S7** The fermentation process of strain MT3. Trends of OD<sub>600</sub> and 2'-FL titer in shake flask with single-switch control. Data are presented as mean ± s.d. of three replicates.

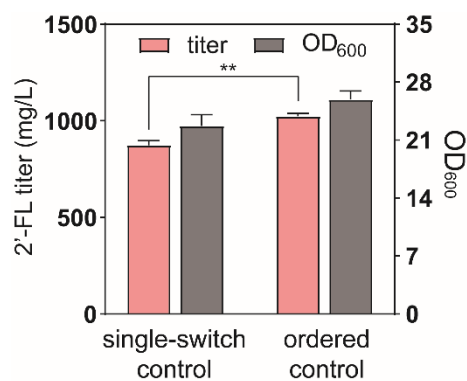

**Figure S8** OD<sub>600</sub> and 2'-FL titer of strain MT14 under different control strategies, including

single-switch control and ordered control (0-12 h at 30 °C ,12-18 h at 34 °C and 12-60 h at 37 °C). The statistical analysis is based on Student's *t*-test. All data were the average of three independent studies with standard deviations. \*\**P* < 0.01.

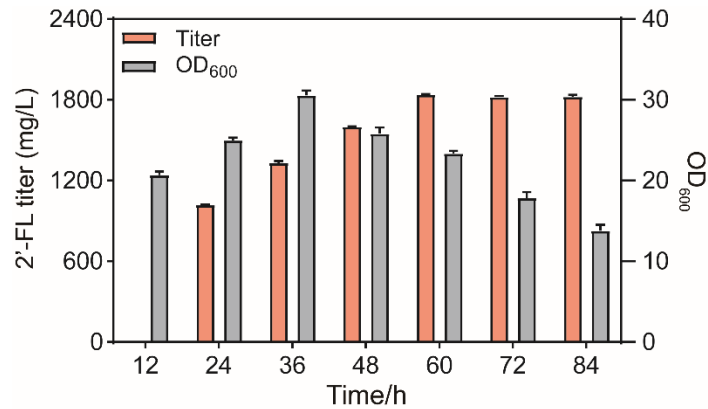

**Figure S9** The OD<sub>600</sub> and 2'-FL titer of strain MT17 for 84 h. All data were the average of three independent studies with standard deviations.

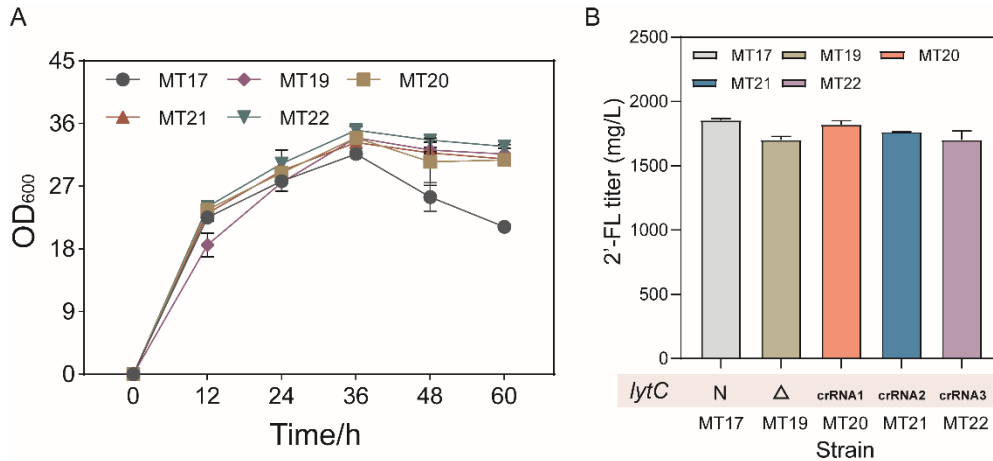

**Figure S10** (A) The OD<sub>600</sub> of recombinant strains with knocking out or knocking down *lytC* in shake flask. (B) The 2'-FL production of recombinant strains in shake flask. "N" means the native gene *lytC* was not engineered. "Δ" means the gene *lytC* was knocked out. The strain MT19 was obtained by knocking out *lytC* directly from the control strain MT17. Three crRNAs that targeted to different positions on *lytC*, driven by the promoter *P<sub>veg5</sub>*, were integrated into the genome of MT17, resulting in the strains MT20 (crRNA1), MT21 (crRNA2) and MT22 (crRNA3), respectively. All data were the average of three independent studies with standard

deviations.

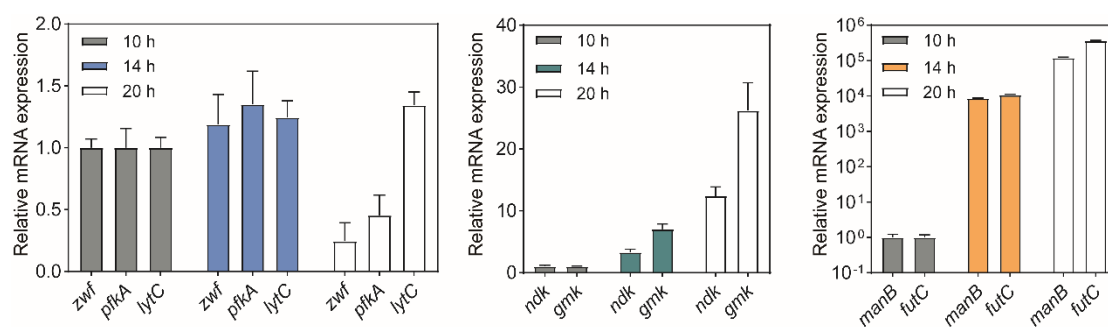

**Figure S11** Relative normalized expression of genes *manB*, *futC*, *ndk*, *gmK*, *lytC*, *zwf* and *pfkA* in strain MT17 by using multi-modular ordered control (0-12 h at 30 °C, 12-18 h at 34 °C and 18-80 h at 37 °C). Data are presented as mean  $\pm$  s.d. of three replicates.

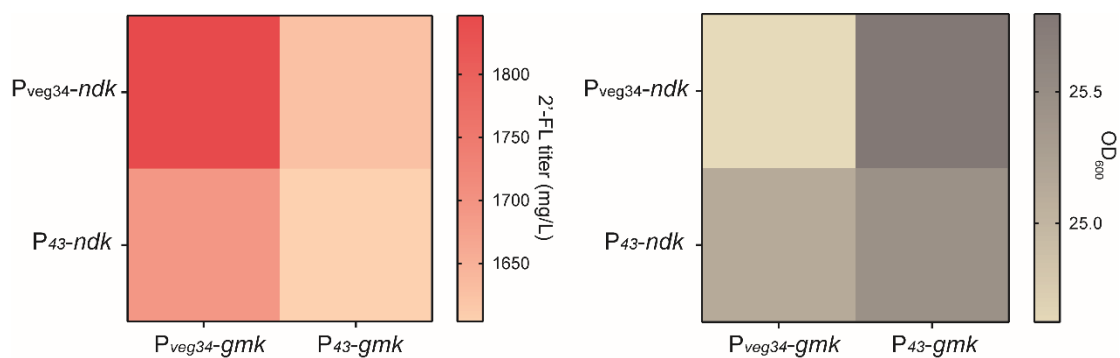

**Figure S12** The cell growth and 2'-FL titer of GTP recycling-modified strains, including MT17, and the recombinant strains with constitutive overexpression of GTP supply by promoter *P<sub>43</sub>*. The statistical analysis is based on Student's *t*-test. All data were the average of three independent studies with standard deviations.
